# Supplementary material for: Novel amphoteric ion exchange membranes by blending sulfonated poly(ether ether ketone)/quaternized poly(ether imide) for vanadium redox flow battery applications
Source: Royal Society of Chemistry journal article supplement (doi:10.1039/c5ta04351d), 2015-01-01
Supplement: c5ta04351d1.pdf [file c5ta04351d1.pdf]

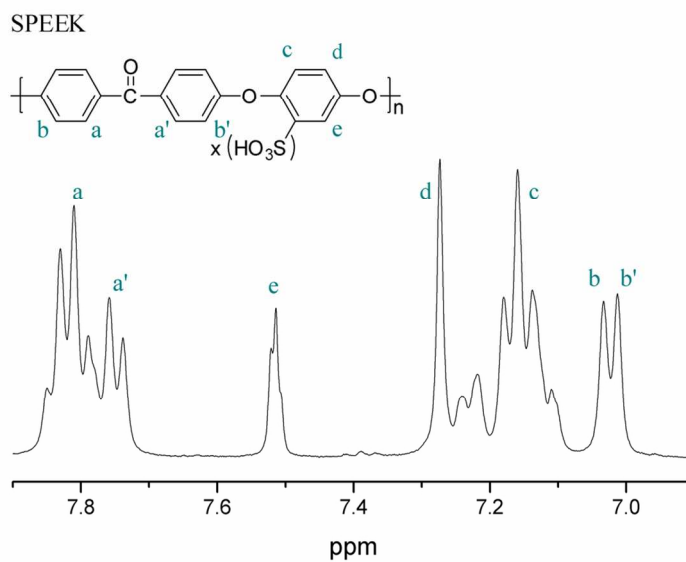

Fig. S1.  $^1\text{H-NMR}$  spectrum of SPEEK.  
57x40mm (600 x 600 DPI)

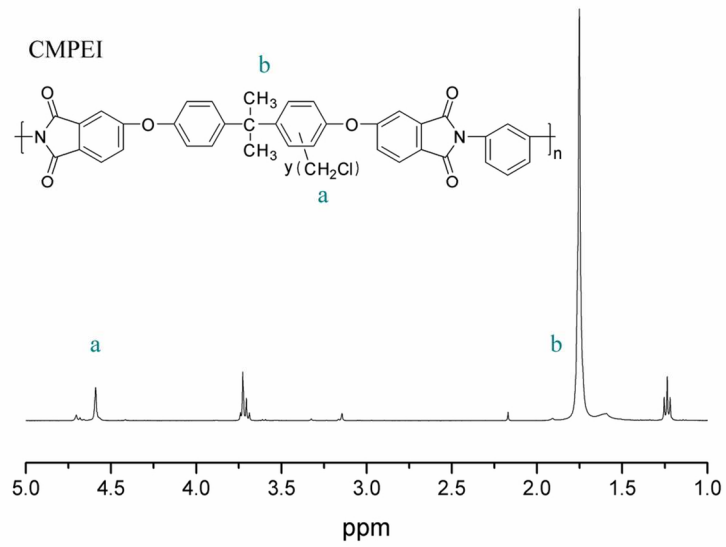

Fig. S2. <sup>1</sup>H-NMR spectrum of CMPEI.  
57x40mm (600 x 600 DPI)

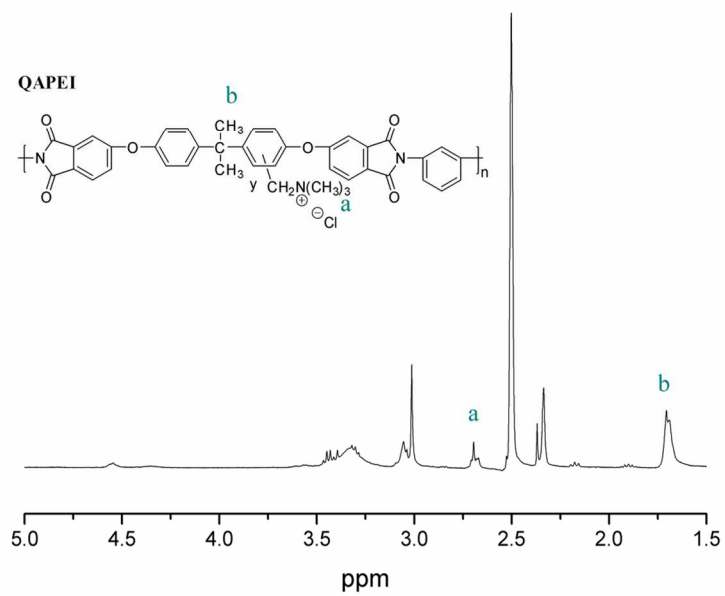

Fig. S3. <sup>1</sup>H-NMR spectrum of QAPEI.  
57x40mm (600 x 600 DPI)

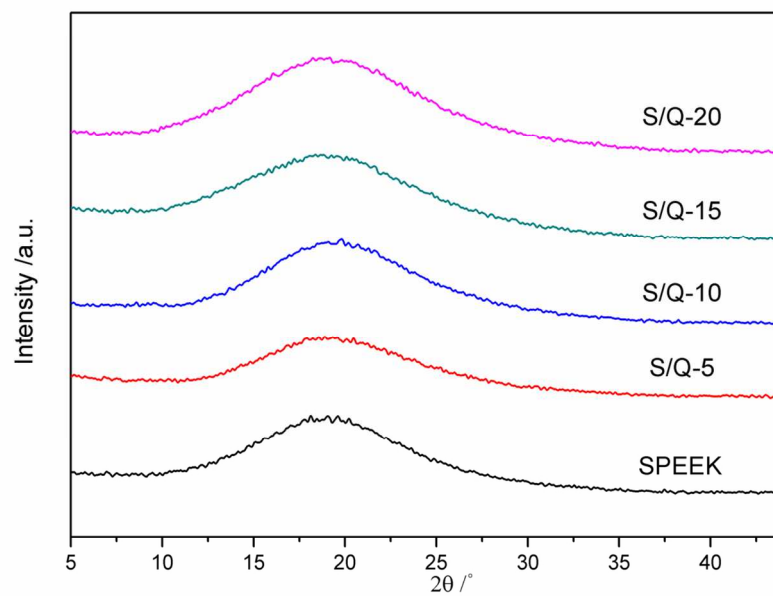

Fig. S4. XRD patterns of SPEEK and S/Q blend membranes.  
58x40mm (600 x 600 DPI)

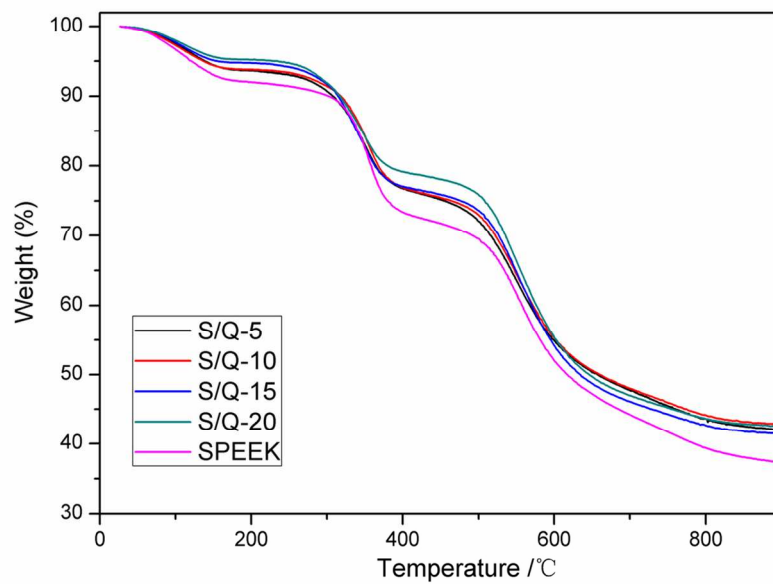

Fig. S5. TGA curves for SPEEK and S/Q blend membranes.  
57x40mm (600 x 600 DPI)
